# Supplementary material
Source: Springer Nature journal article supplement (https://www.springermedizin.de/resource/supplementary/12967_2013_1853_MOESM3_ESM.pdf/9574964)

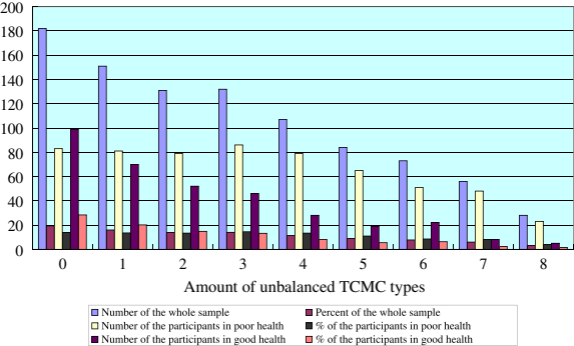

Supplement: MOESM3 [file 9574964]
